# FOCUS

THE JOURNAL OF LIFELONG LEARNING IN PSYCHIATRY



## *Quality and Professionalism in Psychiatry*

*Guest Editors, Kelli Jane K. Harding, M.D.  
Harold Alan Pincus, M.D.*

### IN CLINICAL SYNTHESIS:

Improving the Quality of Psychiatric Care:  
Aligning Research, Policy, and Practice

*Kelli Jane K. Harding, M.D.  
Harold Alan Pincus, M.D.*

Promoting Quality Patient Care Through  
Physician Competence: Applying Deliberate  
Practice to Lifelong Learning

*Larry R. Faulkner, M.D.*

Performance in Practice:  
Physician Practice Assessment Tool for the  
Assessment and Treatment of Adults at  
Risk for Suicide and Suicide-Related Behaviors

*Farisfeh F. Duffy, Ph.D.*

AND INFLUENTIAL PUBLICATIONS . . .
