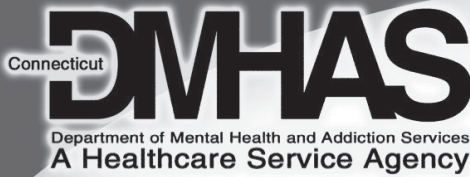

## Staff Psychiatrists and Principal Psychiatrists

The Department of Mental Health & Addiction Services has challenging opportunities for Staff Psychiatrists and Principal Psychiatrists at Capitol Region Mental Health Center, Hartford, CT, Western Connecticut Mental Health Network, Waterbury, CT and Connecticut Valley Hospital, Middletown, CT.

Email [Audrey.Bongiorno@po.state.ct.us](mailto:Audrey.Bongiorno@po.state.ct.us)  
or call **Audrey Bongiorno (860) 262-6740.**

For more information log on to  
**[www.ct.gov/dmhas/  
employmentopportunities.](http://www.ct.gov/dmhas/employmentopportunities)**

*DMHAS is an Affirmative Action/  
Equal Opportunity Employer.  
Members of protected classes  
and/or individuals in recovery  
are encouraged to apply.*

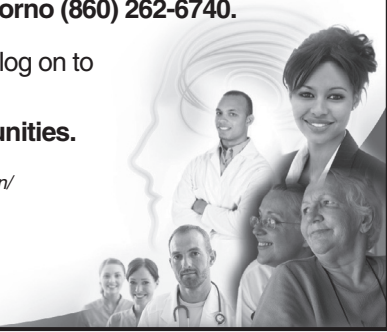

## Textbook of Traumatic Brain Injury, Second Edition

**Edited by Jonathan M. Silver, M.D.,  
Thomas W. McAllister, M.D., and Stuart C. Yudofsky, M.D.**

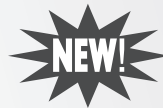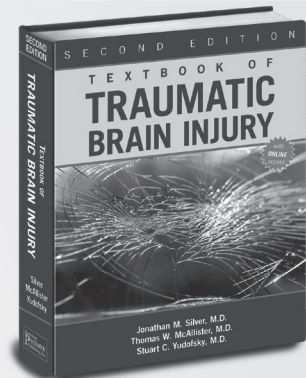

As soldiers and combat veterans have returned from the wars in Iraq and Afghanistan traumatic brain injury (TBI) has been identified as the “signature injury” of those wars. This new edition of *Textbook of Traumatic Brain Injury* has been thoroughly revised and updated from the 2005 first edition to reflect the exponential expansion of research and clinical data amassed in the intervening years. Each chapter was written and reviewed by the foremost authorities in neuropsychiatry, neurology, rehabilitation medicine, and the other specialties who assess, diagnose, and treat these patients.

This book includes a Foreword written by Bob Woodruff (the ABC World News correspondent who sustained a TBI while covering the war in Iraq) and his wife, Lee Woodruff, who underscore that although this volume is intended to be read primarily by professionals, patients and families may also find the information in the textbook to be of keen interest and practical application.

2011 • 704 pages • ISBN 978-1-58562-357-0 • Hardcover • \$159.00 • Item #62357

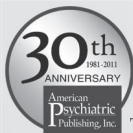

The First and Last Word in Psychiatry

Find us on Facebook and Twitter.

Order Online: [www.appi.org](http://www.appi.org)  
Phone: 1-800-368-5777  
Fax: 703-907-1091  
Email: [appi@psych.org](mailto:appi@psych.org)

Priority Code AH1116

**20% Discount  
For American Psychiatric  
Association Members!**  
**25% Discount For APA  
Members-in-Training**

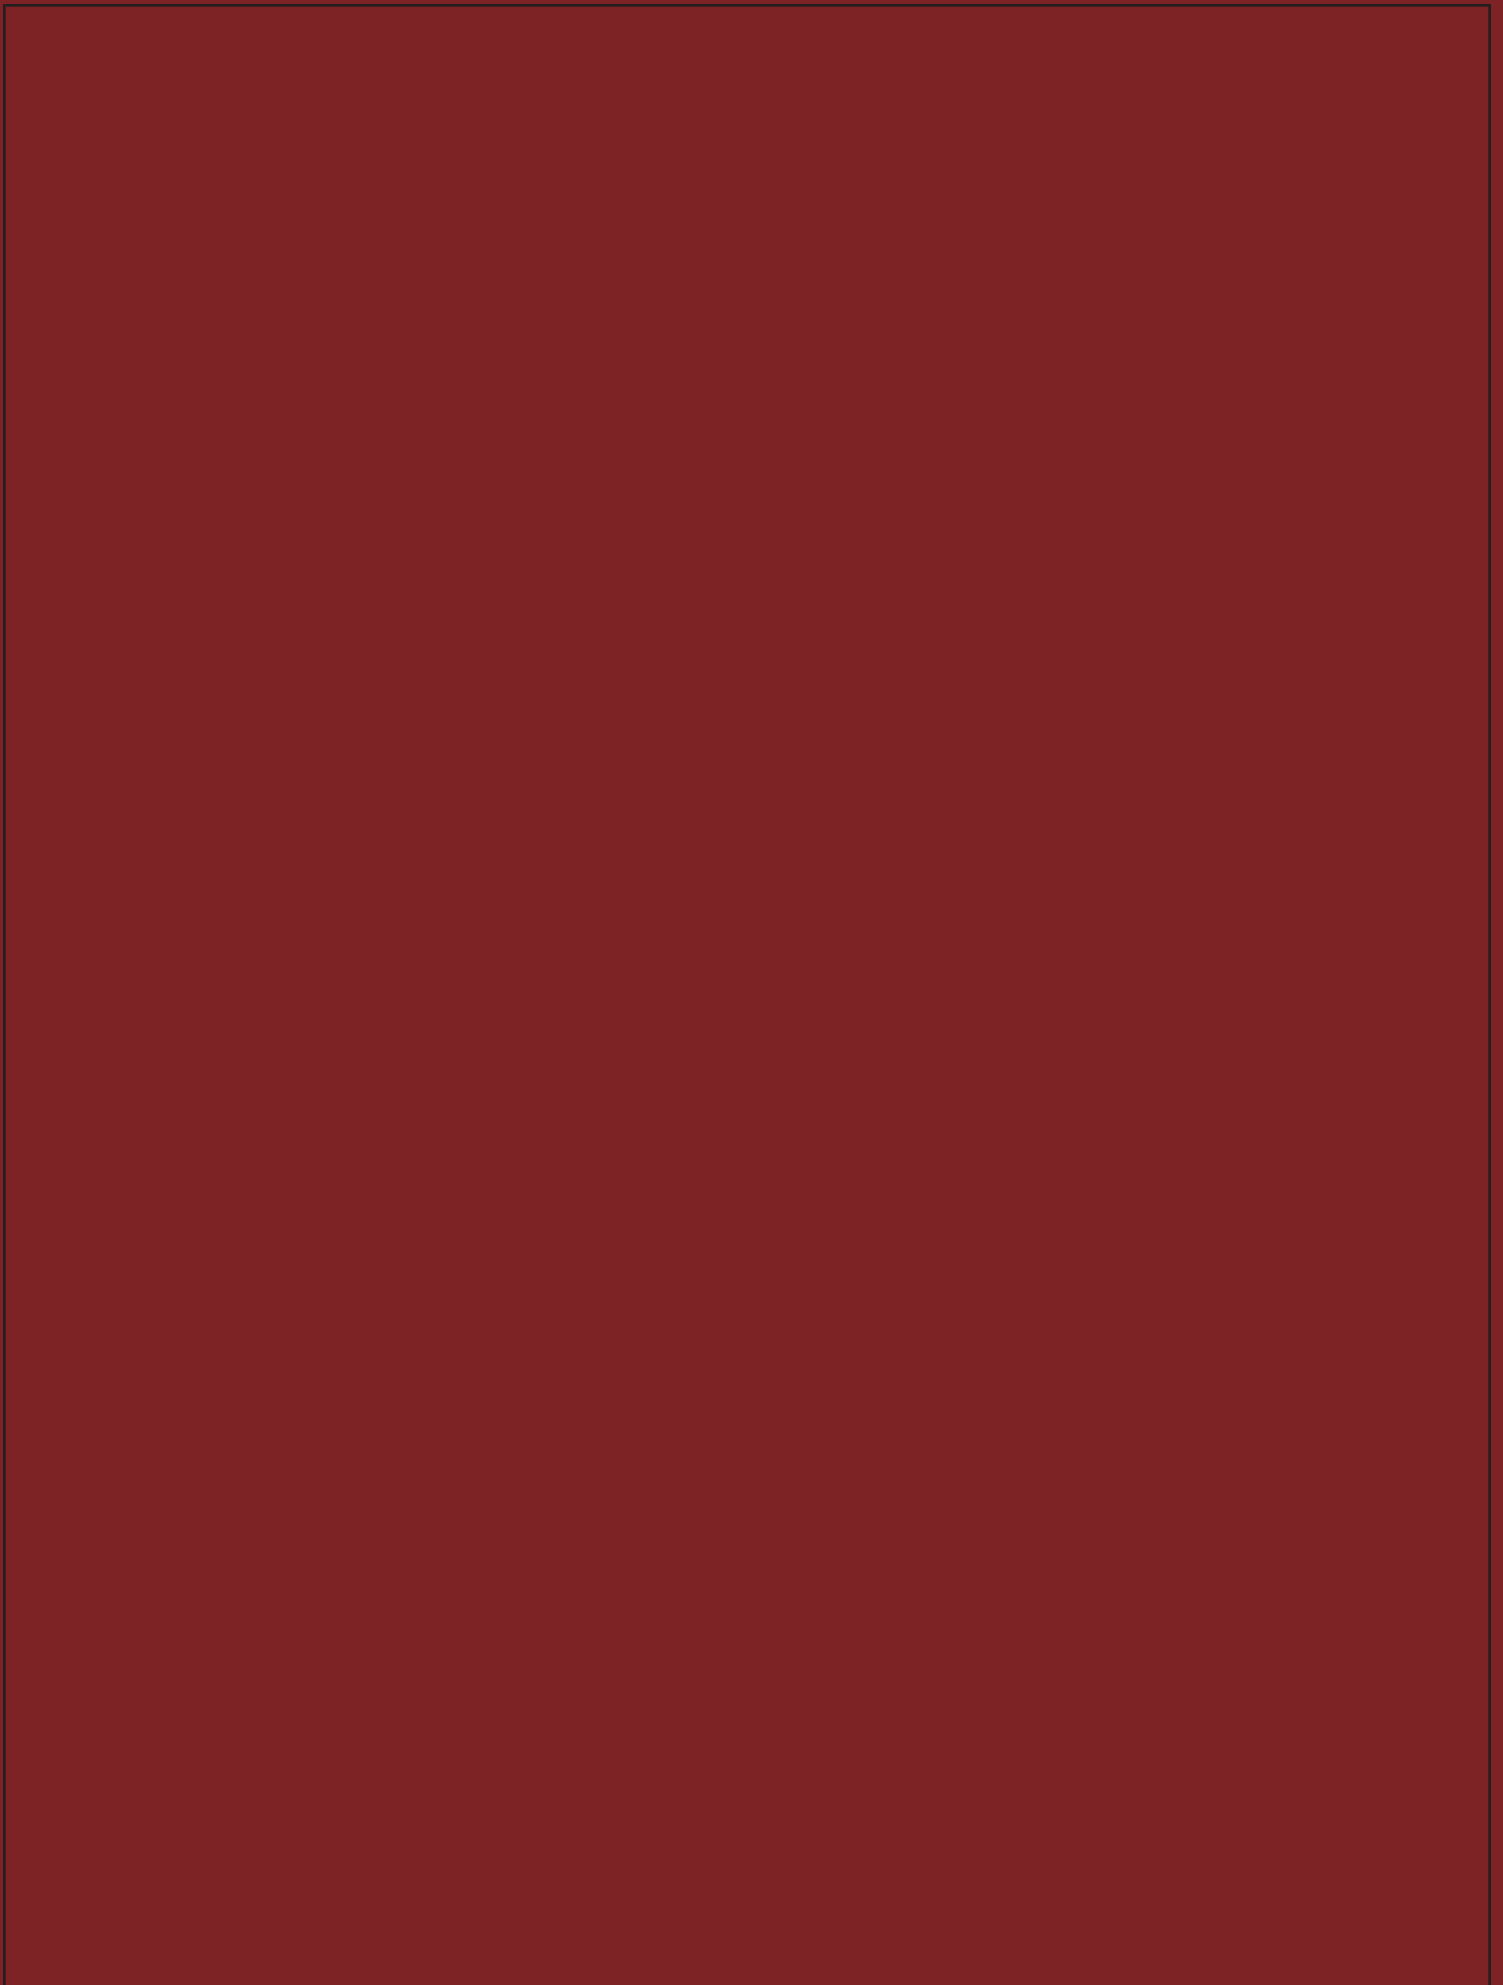

Source: https://psychiatryonline.org/doi/suppl/10.1176/foc.2011.9.issue-2/suppl_file/back.pdf
